# Supplementary figures and images for: Platycodon grandiflorum root fermentation broth reduces inflammation in a mouse IBD model through the AMPK/NF-κB/NLRP3 pathway
Source: Royal Society of Chemistry journal article supplement (doi:10.1039/d1fo03969e), 2022-01-01

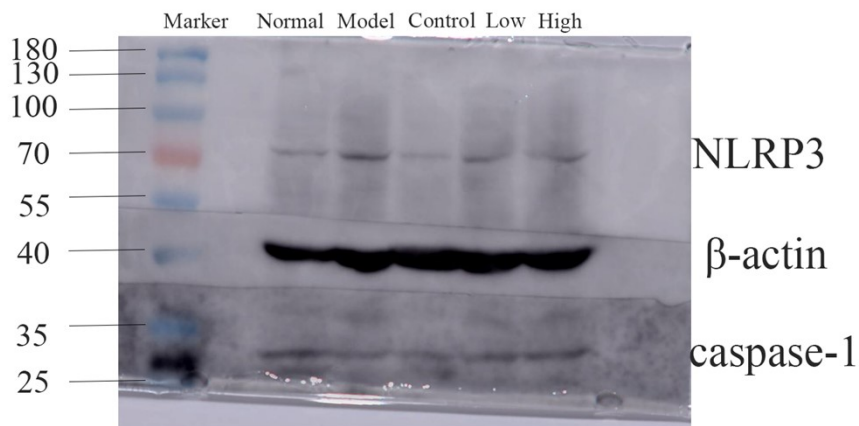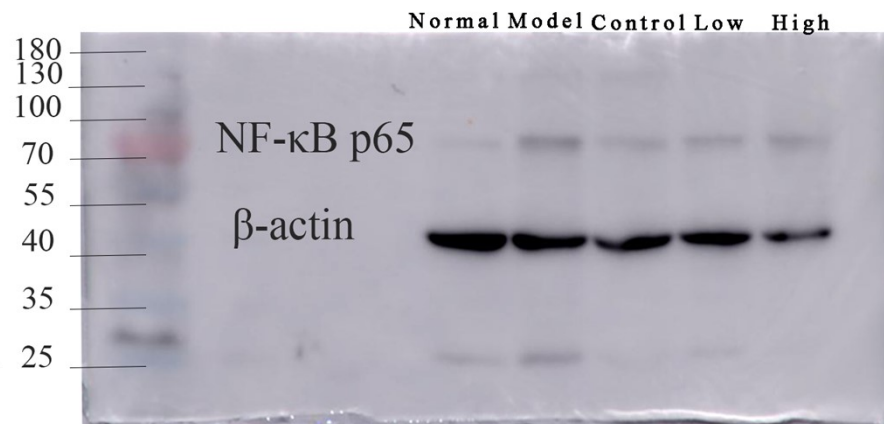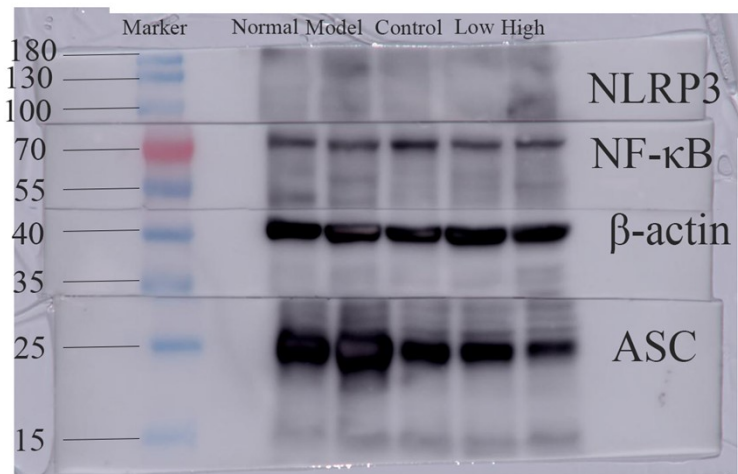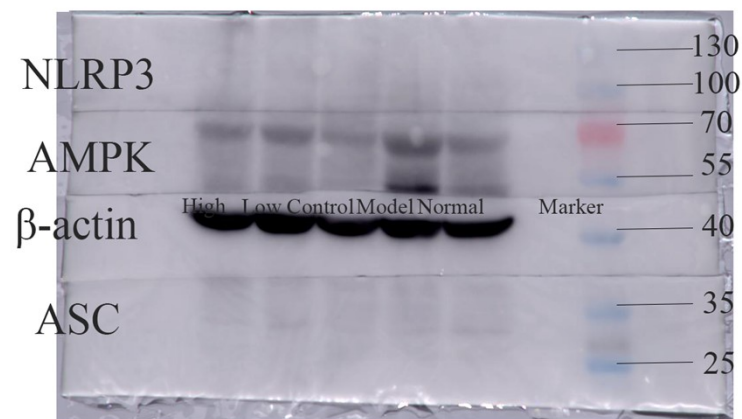

Supplement: d1fo03969e1.pdf [file d1fo03969e1.pdf]
